# Supplementary material
Source: PubMed Central journal article supplement (PMC3911838)
Supplement: IAI.01074-13_zii999090462so1.pdf [file IAI.01074-13_zii999090462so1.pdf]

TABLE S1. Differential expression of genes in COL induced with 1 mM diamide

| Gene/locus          | Function                                                      | Fold change<br>(Diamide/TSB) |
|---------------------|---------------------------------------------------------------|------------------------------|
| <b>Transporters</b> |                                                               |                              |
| <i>aapA</i>         | D-serine/D-alanine/glycine transporter                        | -4.07                        |
| <i>brnQ1</i>        | Branched-chain amino acid transport system II carrier         | -8.00                        |
| <i>copA</i>         | Copper-transporting ATPase                                    | 4.40                         |
| <i>cycA</i>         | D-serine/D-alanine/glycine transporter                        | -4.09                        |
| <i>feoA</i>         | Ferrous iron transport protein A                              | -2.76                        |
| <i>fhuA</i>         | Ferrichrome transport ATP-binding protein                     | 2.50                         |
| <i>fhuB</i>         | Ferrichrome transport permease                                | 2.61                         |
| <i>fhuD</i>         | Ferrichrome transport permease                                | 3.15                         |
| <i>glpT</i>         | Glycerol-3-phosphate transporter                              | -5.74                        |
| <i>nhaC</i>         | Na <sup>+</sup> /H <sup>+</sup> antiporter                    | -2.33                        |
| <i>nixA</i>         | High-affinity nickel-transport protein                        | 3.06                         |
| <i>nupC</i>         | Nucleoside permease                                           | -10.83                       |
| <i>opp-2C</i>       | Peptide ABC transporter, permease protein                     | 2.67                         |
| <i>opp-2D</i>       | Peptide ABC transporter, ATP-binding protein                  | 3.16                         |
| <i>opuBB</i>        | Osmoprotectant ABC transporter, permease protein              | 3.44                         |
| <i>opuD</i>         | Glycine betaine transporter                                   | -3.12                        |
| <i>putP</i>         | High affinity proline permease                                | -3.00                        |
| <i>rarD</i>         | Superfamily drug/metabolite transporter                       | 4.58                         |
| <b>SACOL0261</b>    | Putative drug transporter                                     | 4.85                         |
| <b>SACOL0305</b>    | Permease; Putative                                            | -3.35                        |
| <b>SACOL0665</b>    | Iron compound-binding ABC transporter; Putative               | -4.79                        |
| <b>SACOL0687</b>    | Na <sup>+</sup> /H <sup>+</sup> antiporter; Putative          | 3.56                         |
| <b>SACOL0688</b>    | ABC transporter, substrate-binding protein                    | -9.11                        |
| <b>SACOL0701</b>    | Nucleoside permease                                           | -3.50                        |
| <b>SACOL0722</b>    | Inorganic phosphate transporter                               | -2.21                        |
| <b>SACOL0733</b>    | Sugar efflux transporter; Putative                            | 2.62                         |
| <b>SACOL0744</b>    | ABC transporter ATP-binding protein                           | 3.41                         |
| <b>SACOL0745</b>    | ABC transporter ATP-binding protein                           | 3.39                         |
| <b>SACOL0781</b>    | Osmoprotectant ABC transporter, ATP-binding protein; Putative | 2.94                         |

|                    |                                                          |       |
|--------------------|----------------------------------------------------------|-------|
| <b>SACOL0788</b>   | Proton-dependent oligopeptide transporter family protein | -3.95 |
| <b>SACOL1367</b>   | Amino acid permease                                      | -5.78 |
| <b>SACOL1743</b>   | Amino acid permease                                      | -4.03 |
| <b>SACOL2011</b>   | Sodium transport family protein                          | 2.32  |
| <b>SACOL2170</b>   | Transporter; Putative                                    | 7.37  |
| <b>SACOL2242</b>   | Xanthine/uracil permease family protein                  | -2.72 |
| <b>SACOL2279</b>   | Transporter; Putative                                    | 4.03  |
| <b>SACOL2335</b>   | ABC transporter, ATP-binding protein; Putative           | -6.05 |
| <b>SACOL2401</b>   | Formate/nitrite transporter family protein               | -4.04 |
| <b>SACOL2403</b>   | ABC transporter, substrate-binding protein; Putative     | -3.00 |
| <b>SACOL2416</b>   | Cation efflux family protein; Putative                   | 2.30  |
| <b>SACOL2430</b>   | ABC transporter permease; Putative                       | 2.58  |
| <b>SACOL2718</b>   | Anion transporter family protein                         | -2.26 |
| <b><i>sirA</i></b> | Iron compound ABC transporter                            | -3.25 |
| <b><i>tagH</i></b> | Teichoic acids export protein ATP-binding subunit        | 3.54  |
| <b><i>vraD</i></b> | ABC transporter ATP-binding protein                      | 2.99  |
| <b><i>vraE</i></b> | ABC transporter, permease protein                        | 2.29  |

#### **PTS system**

---

|                    |                                                           |        |
|--------------------|-----------------------------------------------------------|--------|
| <b><i>glcA</i></b> | Glucose-specific PTS transporter protein, IIABC component | -10.93 |
| <b><i>nagE</i></b> | N-acetylglucosamine-specific IIBC component               | -3.53  |
| <b><i>ptaA</i></b> | N-acetylglucosamine-specific IIABC component              | -3.64  |
| <b><i>ptsG</i></b> | PTS system glucose-specific IIBC subunit                  | -10.93 |
| <b><i>treP</i></b> | phosphoenolpyruvate-dependent, trehalose-specific         | -4.91  |

#### **Amino Acid Metabolism and Biosynthesis**

---

|                    |                                       |       |
|--------------------|---------------------------------------|-------|
| <b><i>femC</i></b> | Glutamine synthetase                  | -8.36 |
| <b><i>glnA</i></b> | Glutamine-ammonia ligase              | -8.20 |
| <b><i>glnR</i></b> | Glutamine synthetase repressor        | -9.50 |
| <b><i>glyA</i></b> | Serine hydroxymethyltransferase       | -2.25 |
| <b><i>hisC</i></b> | Histidinol-phosphate aminotransferase | 3.37  |
| <b><i>hutG</i></b> | Formimidoylglutamase                  | -2.36 |
| <b><i>ipdC</i></b> | Indole-3-pyruvate decarboxylase       | 2.36  |

|                  |                                            |       |
|------------------|--------------------------------------------|-------|
| <i>murl</i>      | Glutamate racemase                         | 5.14  |
| <i>purB</i>      | Adenylosuccinate lyase                     | -5.68 |
| <i>rocA</i>      | 1-pyrroline-5-carboxylate dehydrogenase    | 6.02  |
| <i>rocD</i>      | Ornithine-oxo-acid transaminase            | 2.54  |
| <b>SACOL1801</b> | Dipeptidase PepV                           | -3.84 |
| <b>SACOL2114</b> | Aldehyde dehydrogenase (NAD <sup>+</sup> ) | 4.08  |

### Carbohydrate Metabolism and TCA cycle

---

|                  |                                                  |       |
|------------------|--------------------------------------------------|-------|
| <i>ccpA</i>      | Catabolite control protein                       | 2.41  |
| <i>cidC</i>      | Pyruvate oxidase                                 | 2.52  |
| <i>manA1</i>     | Mannose-6-phosphate isomerase                    | -4.40 |
| <i>manA2</i>     | Mannose-6-phosphate isomerase                    | -3.86 |
| <i>mnaA</i>      | UDP-GlcNAc 2-epimerase                           | -2.58 |
| <i>panB</i>      | 3-methyl-2-oxobutanoate hydroxymethyltransferase | 2.70  |
| <i>panC</i>      | Pantoate-beta-alanine ligase                     | 2.67  |
| <i>panD</i>      | Aspartate alpha-decarboxylase                    | 2.84  |
| <i>pflB</i>      | Formate acetyltransferase                        | -2.49 |
| <b>SACOL1439</b> | Acylphosphatase                                  | 2.40  |
| <b>SACOL2103</b> | UDP-GlcNAc 2-epimerase                           | -2.61 |
| <i>sdhA</i>      | Succinate dehydrogenase flavoprotein subunit     | -4.00 |
| <i>sdhB</i>      | Succinate dehydrogenase iron-sulfur subunit      | -3.56 |
| <i>sdhC</i>      | Succinate dehydrogenase cytochrome b-558         | -3.38 |
| <i>sucA</i>      | 2-oxoglutarate dehydrogenase E1 component        | -3.05 |

### Nucleotide Excision and Repair

---

|                  |                                                         |       |
|------------------|---------------------------------------------------------|-------|
| <i>mutS2</i>     | Recombination and DNA strand exchange inhibitor protein | 2.71  |
| <i>radA</i>      | DNA repair                                              | 4.69  |
| <i>radC</i>      | DNA repair protein                                      | 4.68  |
| <b>SACOL1954</b> | Exonuclease                                             | -3.47 |
| <i>uvrA</i>      | Excinuclease ABC subunit A                              | 2.67  |
| <i>uvrB</i>      | Excinuclease ABC subunit B                              | 2.97  |
| <i>uvrC</i>      | Excinuclease ABC subunit C                              | 3.37  |

---

**Virulence Factors**

---

|                  |                                                     |       |
|------------------|-----------------------------------------------------|-------|
| <i>capC</i>      | Capsular polysaccharide biosynthesis protein        | -4.47 |
| <i>capD</i>      | Capsular polysaccharide biosynthesis protein        | -4.82 |
| <i>capF</i>      | Capsular polysaccharide biosynthesis protein        | -2.20 |
| <i>capG</i>      | Capsular polysaccharide biosynthesis protein        | -2.56 |
| <i>crtM</i>      | Squalene desaturase                                 | -3.50 |
| <i>crtN</i>      | Squalene synthase                                   | -3.87 |
| <i>crtQ</i>      | Glycosyl transferase                                | -3.65 |
| <i>ebh</i>       | Cell wall associated fibronectin-binding protein    | 5.99  |
| <i>fntA</i>      | Autolysis and methicillin resistant-related protein | -3.16 |
| <i>geh</i>       | Glycerol ester hydrolase, lipase precursor          | -3.25 |
| <i>hla</i>       | Alpha-hemolysin precursor                           | -6.37 |
| <i>isdA</i>      | Iron-regulated heme-iron binding protein            | -5.11 |
| <i>mntC</i>      | Iron-repressed lipoprotein                          | -9.11 |
| <i>plc</i>       | 1-phosphatidylinositol phosphodiesterase precursor  | -4.17 |
| <b>SACOL1220</b> | Fibronectin/fibrinogen binding-related protein      | 3.47  |
| <i>spa</i>       | Immunoglobulin G binding protein A precursor        | -3.56 |
| <i>sspA</i>      | Serine protease                                     | -2.28 |

---

**Transcriptional Regulators**

---

|                  |                                       |       |
|------------------|---------------------------------------|-------|
| <i>arsR</i>      | Transcriptional regulator             | 4.75  |
| <i>czrA</i>      | Transcriptional regulator             | 4.76  |
| <i>nirR</i>      | Transcriptional regulator             | -5.67 |
| <i>norR</i>      | MarR family transcriptional regulator | -2.25 |
| <b>SACOL0980</b> | LysR family transcriptional regulator | 3.75  |
| <b>SACOL1296</b> | GntR family transcriptional regulator | -2.24 |
| <b>SACOL1550</b> | AraC family transcriptional regulator | 2.52  |
| <b>SACOL2325</b> | LysR family transcriptional regulator | -2.21 |
| <i>spxA</i>      | Transcriptional regulator             | -2.33 |

---

**Other**

---

|             |                                                   |       |
|-------------|---------------------------------------------------|-------|
| <i>acpD</i> | Azoreductase                                      | 22.28 |
| <i>adaB</i> | Methylated DNA-protein cysteine methyltransferase | 2.33  |

|                         |                                                            |       |
|-------------------------|------------------------------------------------------------|-------|
| <b><i>atpA</i></b>      | F0F1 ATP synthase subunit alpha                            | -3.15 |
| <b><i>atpB</i></b>      | F0F1 ATP synthase subunit A                                | -3.34 |
| <b><i>atpC</i></b>      | F0F1 ATP synthase subunit epsilon                          | -2.43 |
| <b><i>atpD</i></b>      | F0F1 ATP synthase subunit beta                             | -2.62 |
| <b><i>atpE</i></b>      | F0F1 ATP synthase subunit C                                | -2.91 |
| <b><i>atpF</i></b>      | F0F1 ATP synthase subunit B                                | -3.05 |
| <b><i>atpG</i></b>      | F0F1 ATP synthase subunit gamma                            | -2.86 |
| <b><i>atpH</i></b>      | F0F1 ATP synthase subunit delta                            | -2.98 |
| <b><i>bshA</i></b>      | Glycosyl transferase involved in bacillithiol biosynthesis | 2.31  |
| <b><i>bshC</i></b>      | Bacillithiol synthase                                      | 5.20  |
| <b><i>cinA</i></b>      | Competence/damage-inducible protein                        | 2.67  |
| <b><i>clpB</i></b>      | ClpB chaperone-like protein                                | 34.39 |
| <b><i>clpP</i></b>      | ATP-dependent Clp protease, proteolytic subunit            | 5.35  |
| <b><i>ctaA</i></b>      | Cytochrome oxidase assembly protein                        | -2.38 |
| <b><i>ctaB</i></b>      | Protoheme IX farnesyltransferase                           | -2.50 |
| <b><i>cysE</i></b>      | Serine acetyltransferase-like protein                      | 2.62  |
| <b><i>cysJ</i></b>      | Sulfite reductase (NADPH) flavoprotein alpha-component     | 2.72  |
| <b><i>def</i></b>       | Peptide deformylase                                        | 2.39  |
| <b><i>dfrA/foIA</i></b> | Dihydrofolate reductase                                    | -3.00 |
| <b><i>dnaK</i></b>      | Molecular chaperone                                        | 7.93  |
| <b><i>ezrA</i></b>      | Septation ring formation regulator                         | -2.37 |
| <b><i>fdhD</i></b>      | Formate dehydrogenase accessory protein                    | 3.76  |
| <b><i>fer</i></b>       | Ferredoxin                                                 | 2.91  |
| <b><i>ftn</i></b>       | Ferritin                                                   | -5.00 |
| <b><i>fumC</i></b>      | Fumarate hydratase                                         | -3.44 |
| <b><i>gatA</i></b>      | Aspartyl/glutamyl-tRNA amidotransferase subunit A          | -2.99 |
| <b><i>gatB</i></b>      | Aspartyl/glutamyl-tRNA amidotransferase subunit B          | -2.61 |
| <b><i>gatC</i></b>      | Aspartyl/glutamyl-tRNA amidotransferase subunit C          | 5.33  |
| <b><i>glcT</i></b>      | Transcription antiterminator                               | 2.67  |
| <b><i>glpQ</i></b>      | Glycerophosphoryl diester phosphodiesterase                | -2.77 |
| <b><i>groEL</i></b>     | Chaperonin                                                 | 7.17  |
| <b><i>groES</i></b>     | Co-chaperonin                                              | 7.25  |
| <b><i>grpE</i></b>      | Heat shock protein                                         | 6.76  |

|                     |                                                             |        |
|---------------------|-------------------------------------------------------------|--------|
| <b><i>guaC</i></b>  | Guanosine 5'-monophosphate oxidoreductase                   | -3.91  |
| <b><i>hsIO</i></b>  | Hsp33-like chaperonin                                       | 3.92   |
| <b><i>lytH</i></b>  | N-acetylmuramoyl-L-alanine amidase                          | -3.31  |
| <b><i>metG</i></b>  | Methionyl-tRNA synthetase                                   | -2.30  |
| <b><i>mnmA</i></b>  | tRNA-specific 2-thiouridylase                               | 2.67   |
| <b><i>moaA</i></b>  | Molybdenum cofactor biosynthesis protein A                  | 2.34   |
| <b><i>moaD</i></b>  | Molybdopterin converting factor, subunit 1                  | 2.40   |
| <b><i>mobA</i></b>  | Molybdopterin-guanine dinucleotide biosynthesis protein A   | 2.42   |
| <b><i>modA</i></b>  | Molybdate-binding protein                                   | -2.49  |
| <b><i>mraY</i></b>  | Phospho-N-acetylmuramoyl-pentapeptide-transferase           | -2.93  |
| <b><i>nth</i></b>   | Endonuclease-like protein; Base excision repair             | 2.65   |
| <b><i>nuc</i></b>   | Thermonuclease precursor                                    | -35.53 |
| <b><i>pbp4</i></b>  | Penicillin-binding protein 4                                | -2.41  |
| <b><i>pepA1</i></b> | Glutamyl aminopeptidase                                     | 2.42   |
| <b><i>pepF</i></b>  | Oligoendopeptidase F                                        | -6.38  |
| <b><i>prmA</i></b>  | Ribosomal protein L11 methyltransferase                     | 5.79   |
| <b><i>purC</i></b>  | Phosphoribosylaminoimidazole carboxylase, catalytic subunit | -2.56  |
| <b><i>purE</i></b>  | Phosphoribosylaminoimidazole carboxylase, catalytic subunit | -6.55  |
| <b><i>purK</i></b>  | Phosphoribosylaminoimidazole carboxylase ATPase subunit     | -6.55  |
| <b><i>purQ</i></b>  | Phosphoribosylformylglycinamide synthase I                  | -11.12 |
| <b><i>purS</i></b>  | Phosphoribosylformylglycinamide synthase                    | -7.22  |
| <b><i>pyrH</i></b>  | Uridylate kinase                                            | -2.70  |
| <b><i>qoxA</i></b>  | Quinol oxidase, subunit I                                   | -2.63  |
| <b><i>qoxB</i></b>  | Quinol oxidase, subunit II                                  | -2.77  |
| <b><i>qoxC</i></b>  | Quinol oxidase polypeptide III                              | -2.74  |
| <b><i>qoxD</i></b>  | Quinol oxidase polypeptide IV                               | -3.72  |
| <b><i>recJ</i></b>  | Single-stranded-DNA-specific exonuclease                    | 2.52   |
| <b><i>recX</i></b>  | Recombination regulator                                     | 2.33   |
| <b><i>rexA</i></b>  | Exonuclease                                                 | 2.51   |
| <b><i>ribAB</i></b> | Riboflavin biosynthesis protein                             | 4.88   |
| <b><i>ribE</i></b>  | Riboflavin synthase subunit alpha                           | 4.61   |
| <b><i>ribF</i></b>  | Riboflavin biosynthesis protein                             | 2.52   |
| <b><i>ribH</i></b>  | 6,7-dimethyl-8-ribityllumazine synthase                     | 3.91   |

|                    |                                                |       |
|--------------------|------------------------------------------------|-------|
| <b><i>sigB</i></b> | RNA polymerase sigma factor SigB               | -3.29 |
| <b><i>rsbV</i></b> | Anti-sigma-B factor                            | -2.30 |
| <b><i>rsbW</i></b> | Serine-protein kinase                          | -3.29 |
| <b><i>sasF</i></b> | Fatty-acid responsive surface-anchored protein | 2.33  |
| <b><i>smbA</i></b> | Uridylate kinase                               | -2.66 |
| <b><i>srrA</i></b> | Staphylococcal respiratory response protein    | -2.46 |
| <b><i>thiD</i></b> | Phosphomethylpyrimidine kinase                 | 2.57  |
| <b><i>truB</i></b> | tRNA pseudouridine 5s synthase                 | 2.50  |
| <b><i>ung</i></b>  | Uracil-DNA glycosylase                         | -2.98 |
| <b><i>upp</i></b>  | Uracil phosphoribosyltransferase               | -2.65 |
| <b><i>ureA</i></b> | Urease subunit gamma                           | 3.89  |
| <b><i>ureC</i></b> | Urease subunit alpha                           | 2.77  |
| <b><i>ureD</i></b> | Urease accessory protein                       | 2.39  |
| <b><i>ureE</i></b> | Urease accessory protein                       | 2.38  |
| <b><i>ypfP</i></b> | Diacylglycerol glucosyltransferase             | 2.62  |
| <b><i>zwf</i></b>  | Glucose-6-phosphate 1-dehydrogenase            | 3.38  |

#### **Hypothetical and Putative Proteins**

---

|                  |                                                      |       |
|------------------|------------------------------------------------------|-------|
| <b>SACOL1440</b> | Hypothetical protein                                 | 2.48  |
| <b>SACOL1444</b> | Hypothetical protein                                 | 2.29  |
| <b>SACOL1491</b> | Hypothetical protein                                 | 3.07  |
| <b>SACOL1493</b> | DNA replication protein; Putative                    | 2.91  |
| <b>SACOL1501</b> | Hypothetical protein                                 | 2.30  |
| <b>SACOL1520</b> | Pyridine nucleotide-disulfide oxidoreductase         | 4.24  |
| <b>SACOL1526</b> | Hypothetical protein                                 | 4.01  |
| <b>SACOL1553</b> | Glyoxalase family protein                            | 2.46  |
| <b>SACOL1555</b> | M20/M25/M40 family peptidase                         | 3.85  |
| <b>SACOL1557</b> | Hypothetical protein                                 | 2.79  |
| <b>SACOL1607</b> | 5-formyltetrahydrofolate cyclo-ligase family protein | -2.80 |
| <b>SACOL1634</b> | 16S ribosomal RNA methyltransferase                  | 2.79  |
| <b>SACOL1677</b> | Aminotransferase, class V                            | 3.21  |
| <b>SACOL1678</b> | Luciferase family protein                            | 22.17 |
| <b>SACOL1705</b> | Hypothetical protein                                 | -3.05 |

|                  |                                                          |       |
|------------------|----------------------------------------------------------|-------|
| <b>SACOL1749</b> | NADP-dependent malic enzyme; Putative                    | -2.20 |
| <b>SACOL1753</b> | Universal stress protein                                 | -2.92 |
| <b>SACOL1768</b> | GAF domain-containing protein                            | 2.79  |
| <b>SACOL1770</b> | Glycerophosphoryl diester phosphodiesterase; Putative    | -2.82 |
| <b>SACOL1771</b> | OsmC/Ohr family protein                                  | 5.09  |
| <b>SACOL1776</b> | 1-acyl-sn-glycerol-3-phosphate acyltransferase; Putative | -5.45 |
| <b>SACOL1826</b> | Hypothetical protein                                     | 2.57  |
| <b>SACOL1827</b> | RNA polymerase sigma-70 family protein                   | 2.35  |
| <b>SACOL1835</b> | Aldo/keto reductase family oxidoreductase                | 2.42  |
| <b>SACOL1846</b> | Hypothetical protein                                     | -4.49 |
| <b>SACOL1846</b> | Hypothetical protein                                     | -4.49 |
| <b>SACOL1939</b> | Phosphotyrosine protein phosphatase                      | -2.38 |
| <b>SACOL1941</b> | Ribonuclease; Putative                                   | -8.10 |
| <b>SACOL1952</b> | Ferritins family protein                                 | -5.12 |
| <b>SACOL1976</b> | Nitric-oxide synthase, oxygenase subunit                 | -3.43 |
| <b>SACOL1983</b> | Hypothetical protein                                     | 4.30  |
| <b>SACOL1998</b> | Hypothetical protein                                     | 3.89  |
| <b>SACOL2020</b> | Hypothetical protein                                     | 10.21 |
| <b>SACOL2021</b> | Carbon-nitrogen family hydrolase                         | 5.57  |
| <b>SACOL2037</b> | Hypothetical protein                                     | -4.11 |
| <b>SACOL2102</b> | Hypothetical protein                                     | -3.01 |
| <b>SACOL2106</b> | Hypothetical protein                                     | -2.53 |
| <b>SACOL2107</b> | Phosphotyrosine protein phosphatase                      | -2.35 |
| <b>SACOL2134</b> | Hypothetical protein                                     | -3.56 |
| <b>SACOL2136</b> | Hypothetical protein                                     | -2.73 |
| <b>SACOL2168</b> | Hypothetical protein                                     | 2.78  |
| <b>SACOL2169</b> | Aerobactin biosynthesis protein                          | 3.58  |
| <b>SACOL2174</b> | Hypothetical protein                                     | -3.80 |
| <b>SACOL2175</b> | Hypothetical protein                                     | -4.13 |
| <b>SACOL2177</b> | Alcohol dehydrogenase; Putative                          | 3.48  |
| <b>SACOL2178</b> | Alcohol dehydrogenase; Putative                          | 4.20  |
| <b>SACOL2179</b> | Hypothetical protein                                     | 4.55  |
| <b>SACOL2193</b> | MerR family transcriptional regulator                    | 4.02  |



|                    |                                                         |       |
|--------------------|---------------------------------------------------------|-------|
| <b>SACOL2241</b>   | Hypothetical protein                                    | 3.80  |
| <b>SACOL2247</b>   | Hypothetical protein                                    | 7.63  |
| <b>SACOL2293</b>   | NAD/NADP octopine/nopaline dehydrogenase family protein | -3.21 |
| <b>SACOL2294</b>   | Hypothetical protein                                    | -2.70 |
| <b>SACOL2300</b>   | Hypothetical protein                                    | -4.90 |
| <b>SACOL2330</b>   | Hypothetical protein                                    | 2.39  |
| <b>SACOL2334</b>   | Hypothetical protein                                    | -3.09 |
| <b>SACOL2344</b>   | Hypothetical protein                                    | 2.66  |
| <b>SACOL2368</b>   | Acetyltransferase; Putative                             | 5.24  |
| <b>SACOL2369</b>   | Pyridine nucleotide-disulfide oxidoreductase            | 4.26  |
| <b>SACOL2391</b>   | Hypothetical protein                                    | -2.55 |
| <b>SACOL2400</b>   | Acetyltransferase; Putative                             | 2.98  |
| <b>SACOL2439</b>   | Hypothetical protein                                    | 6.06  |
| <b>SACOL2440</b>   | Hypothetical protein                                    | 7.25  |
| <b>SACOL2446</b>   | Epimerase/dehydratase; Putative                         | 2.55  |
| <b>SACOL2520</b>   | Hypothetical protein                                    | 2.57  |
| <b>SACOL2549</b>   | Hypothetical protein                                    | 4.56  |
| <b>SACOL2550</b>   | Hypothetical protein                                    | 6.58  |
| <b>SACOL2551</b>   | Hypothetical protein                                    | 7.30  |
| <b>SACOL2554</b>   | Hypothetical protein                                    | 2.31  |
| <b>SACOL2554.1</b> | Holin-like protein                                      | 2.40  |
| <b>SACOL2570</b>   | Galactoside O-acetyltransferase                         | 12.67 |
| <b>SACOL2573</b>   | Copper ion binding protein; Putative                    | 11.39 |
| <b>SACOL2579</b>   | Phytoene dehydrogenase; Putative                        | -4.33 |
| <b>SACOL2580</b>   | Hypothetical protein                                    | -4.29 |
| <b>SACOL2588</b>   | Hypothetical protein                                    | 6.62  |
| <b>SACOL2589</b>   | Hypothetical protein                                    | 5.99  |
| <b>SACOL2598</b>   | Cobalamin synthesis protein; Putative                   | 2.65  |
| <b>SACOL2599</b>   | Hypothetical protein                                    | 2.53  |
| <b>SACOL2638</b>   | Precorrin-2 dehydrogenase; Putative                     | 2.58  |
| <b>SACOL2717</b>   | Hypothetical protein                                    | -4.03 |
| <b>SACOL2733</b>   | Hypothetical protein                                    | -2.45 |
| <b>sarV</b>        | Hypothetical protein                                    | 2.42  |

|                   |                            |       |
|-------------------|----------------------------|-------|
| <b><i>tal</i></b> | Transaldolase; Putative    | 4.47  |
| <b><i>tpx</i></b> | Thiol peroxidase; Putative | 2.34  |
| <b><i>veg</i></b> | Hypothetical protein       | -2.46 |

---

Fold change determined for expression of genes in COL grown in TSB with diamide over expression in COL grown in TSB alone
