# Supplementary material
Source: PubMed Central journal article supplement (PMC3911838)
Supplement: IAI.01074-13_zii999090462so2.pdf [file IAI.01074-13_zii999090462so2.pdf]

TABLE S2. Differential expression of genes in isogenic strains induced with 1 mM diamide

| Gene/locus                                    | Function                                      | Fold Change<br>( $\Delta bshA/COL$ ) |
|-----------------------------------------------|-----------------------------------------------|--------------------------------------|
| <b>Transporters</b>                           |                                               |                                      |
| <i>feoA</i>                                   | Ferrous iron transport protein A              | 3.33                                 |
| <i>feoB</i>                                   | Ferrous iron transport protein B              | 4.00                                 |
| <b>SACOL0195</b>                              | Maltose ABC transporter                       | 2.63                                 |
| <b>SACOL0688</b>                              | ABC transporter; Putative                     | 2.86                                 |
| <i>trkA</i>                                   | Potassium uptake protein                      | 2.17                                 |
| <i>uhpT</i>                                   | Hexose phosphate transport protein            | 4.76                                 |
| <b>Amino Acid Metabolism and Biosynthesis</b> |                                               |                                      |
| <i>ipdC</i>                                   | Indole-3-pyruvate decarboxylase               | 2.38                                 |
| <b>SACOL1976</b>                              | Nitric-oxide synthase, oxygenase subunit      | 2.56                                 |
| <b>Carbohydrate Metabolism and TCA cycle</b>  |                                               |                                      |
| <i>folA</i>                                   | Dihydrofolate reductase                       | 2.38                                 |
| <i>ldh1</i>                                   | L-lactate dehydrogenase                       | 2.22                                 |
| <i>pckA</i>                                   | Phosphoenolpyruvate carboxykinase             | 2.17                                 |
| <i>pflA</i>                                   | Formate acetyltransferase                     | 3.57                                 |
| <i>pflB</i>                                   | Formate acetyltransferase                     | 6.25                                 |
| <i>sdhC</i>                                   | Succinate dehydrogenase cytochrome B-558      | 2.33                                 |
| <i>treP</i>                                   | PTS system, trehalose-specific IIBC component | 2.44                                 |
| <i>gpm</i>                                    | Phosphoglycerate mutase                       | 2.33                                 |
| <b>Virulence Factors</b>                      |                                               |                                      |
| <i>cidA</i>                                   | Holin-like protein                            | 3.70                                 |
| <i>coa</i>                                    | Staphylocoagulase precursor                   | 6.25                                 |
| <i>hla</i>                                    | Alpha-hemolysin precursor                     | 3.13                                 |
| <i>isdA</i>                                   | LPXTG cell wall surface anchor protein        | -2.99                                |
| <i>isdC</i>                                   | Iron-regulated cell surface protein           | -3.68                                |
| <b>Transcriptional Regulators</b>             |                                               |                                      |
| <i>nirR</i>                                   | Transcriptional regulator                     | 2.27                                 |
| <b>SACOL1296</b>                              | GntR family transcriptional regulator         | -2.01                                |

|                  |                                                             |      |
|------------------|-------------------------------------------------------------|------|
| <b>SACOL0218</b> | MarR family member                                          | 3.23 |
| <b>SACOL1242</b> | Fatty acid biosynthesis transcriptional regulator; Putative | 2.17 |

### Hypothetical & Putative Proteins

---

|                     |                                                             |         |
|---------------------|-------------------------------------------------------------|---------|
| <b><i>bshA</i></b>  | Glycosyl transferase involved in BSH biosynthesis           | -137.14 |
| <b><i>crtM</i></b>  | Squalene desaturase                                         | 2.63    |
| <b><i>crtN</i></b>  | Squalene synthase                                           | 2.08    |
| <b><i>crtQ</i></b>  | Glycosyl transferase, group 2 family protein                | 2.50    |
| <b><i>cydA</i></b>  | Cytochrome d ubiquinol oxidase, subunit I                   | 2.63    |
| <b><i>deoD</i></b>  | Purine nucleoside phosphorylase                             | 3.23    |
| <b><i>fntB</i></b>  | Cell wall-associated protein                                | 2.27    |
| <b><i>groEL</i></b> | Chaperonin                                                  | -2.31   |
| <b><i>groES</i></b> | Co-chaperonin                                               | -2.65   |
| <b><i>lytH</i></b>  | N-acetylmuramoyl-L-alanine amidase                          | -2.19   |
| <b><i>mntC</i></b>  | Iron-repressed lipoprotein                                  | 2.94    |
| <b><i>mraY</i></b>  | Phospho-N-acetylmuramoyl-pentapeptide-transferase           | 2.17    |
| <b><i>nanA</i></b>  | N-acetylneuraminatase lyase                                 | 2.17    |
| <b><i>nuc</i></b>   | Thermonuclease precursor                                    | -2.67   |
| <b><i>purE</i></b>  | Phosphoribosylaminoimidazole carboxylase, catalytic subunit | 2.13    |
| <b><i>sodA</i></b>  | Superoxide dismutase                                        | -2.00   |
| <b><i>sodM</i></b>  | Manganese/iron superoxide dismutase                         | -2.00   |
| <b><i>srrA</i></b>  | Staphylococcal respiratory response protein                 | 2.38    |
| <b><i>sucA</i></b>  | 2-oxoglutarate dehydrogenase E1 component                   | 2.13    |

### Other

---

|                    |                                                |       |
|--------------------|------------------------------------------------|-------|
| <b><i>cidB</i></b> | Unknown function                               | 2.70  |
| <b><i>plsX</i></b> | Glycerol-3-phosphate acyltransferase; Putative | 2.17  |
| <b>SACOL0223</b>   | Unknown function                               | 2.27  |
| <b>SACOL0606</b>   | HAD superfamily hydrolase                      | -2.02 |
| <b>SACOL0851</b>   | Lipoprotein; Putative                          | -2.31 |
| <b>SACOL0871</b>   | GNAT family acetyltransferase                  | -2.08 |
| <b>SACOL1502</b>   | IDEAL family protein                           | 2.04  |
| <b>SACOL1503</b>   | Tetratricopeptide repeat family protein        | 2.13  |
| <b>SACOL1846</b>   | Excalibur calcium-binding domain protein       | 3.70  |
| <b>SACOL2402</b>   | S-transferase; Putative                        | -2.04 |

|                  |                                           |      |
|------------------|-------------------------------------------|------|
| <b>SACOL2425</b> | 8-amino-7-oxononanoate synthase; Putative | 2.13 |
| <b>SACOL2491</b> | Unknown function                          | 3.33 |
| <b>SACOL2579</b> | Phytoene dehydrogenase; Putative          | 2.63 |
| <b>SACOL2676</b> | LPXTG-containing protein                  | 2.00 |

---

\*Change in *bshA* mutant induced with 1 mM diamide relative to wild type induced in 1 mM diamide.
